# Supplementary material for: A systemic transcriptome analysis reveals the regulation of neural stem cell maintenance by an E2F1–miRNA feedback loop
Source: PubMed Central journal article supplement — Nucleic Acids Res. 2013 Feb 8;41(6):3699–712. doi: 10.1093/nar/gkt070 (PMC3616707; doi:10.1093/nar/gkt070), 2013-02-08
Supplement: supp_gkt070_nar-01554-h-2012-File009.pdf [file supp_gkt070_nar-01554-h-2012-File009.pdf]

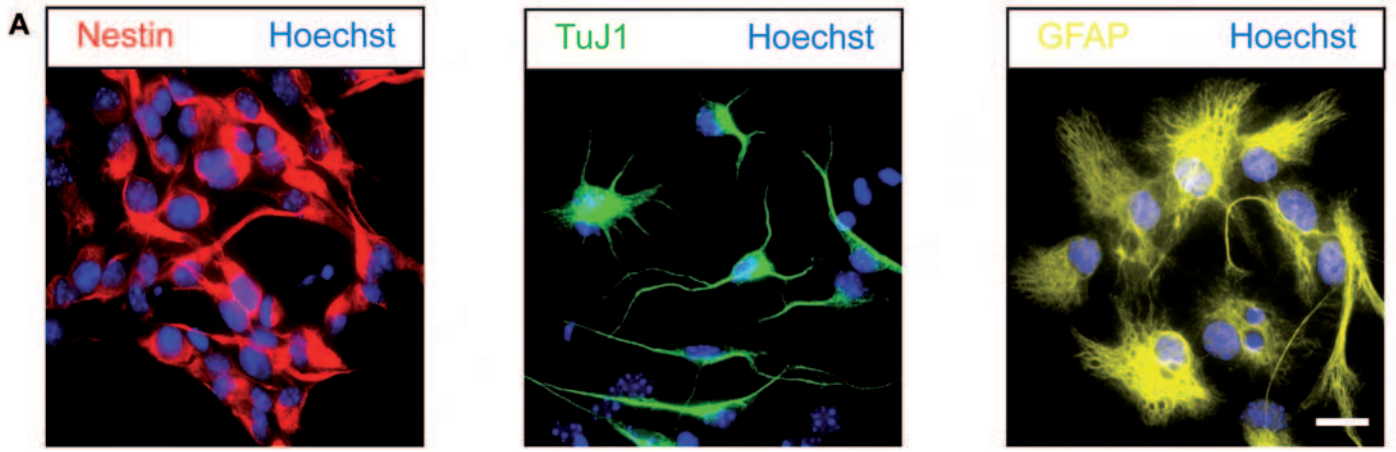

Figure S1A



G

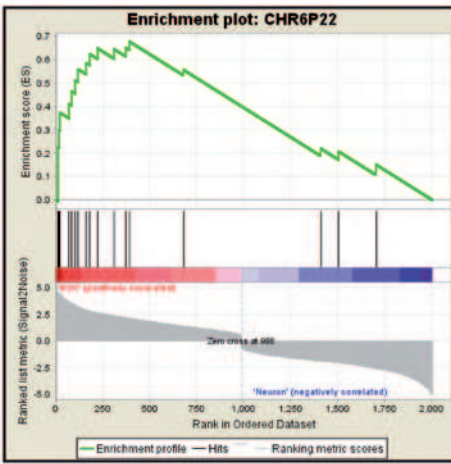

| NSC  |      | Neuron |      | SampleName                                                                     |
|------|------|--------|------|--------------------------------------------------------------------------------|
| 1234 | 1234 | 1234   | 1234 |                                                                                |
|      |      |        |      | HIST1H4D HIST1H4D histone cluster 1, H4d                                       |
|      |      |        |      | HIST1H2AF HIST1H2AF histone cluster 1, H2af                                    |
|      |      |        |      | HIST1H2AA HIST1H2AA histone cluster 1, H2aa                                    |
|      |      |        |      | HIST1H4H HIST1H4H histone cluster 1, H4h                                       |
|      |      |        |      | HIST1H4F HIST1H4F histone cluster 1, H4f                                       |
|      |      |        |      | HIST1H2AR HIST1H2AR histone cluster 1, H2ar                                    |
|      |      |        |      | TCF19 TCF19 transcription factor 19 (SFI)                                      |
|      |      |        |      | HIST1H2AF HIST1H2AF histone cluster 1, H2af                                    |
|      |      |        |      | HIST1H2BA HIST1H2BA histone cluster 1, H2ba                                    |
|      |      |        |      | HIST1H1A HIST1H1A histone cluster 1, H1a                                       |
|      |      |        |      | HIST1H2BM HIST1H2BM histone cluster 1, H2bm                                    |
|      |      |        |      | MROAT1 MROAT1 membrane bound O-acyltransferase domain containing 1             |
|      |      |        |      | HIST1H1B HIST1H1B histone cluster 1, H1b                                       |
|      |      |        |      | CLIC1 CLIC1 chloride intracellular channel 1                                   |
|      |      |        |      | HIST1H2BR HIST1H2BR histone cluster 1, H2br                                    |
|      |      |        |      | HIST1H4C HIST1H4C histone cluster 1, H4c                                       |
|      |      |        |      | HIST1H2AC HIST1H2AC histone cluster 1, H2ac                                    |
|      |      |        |      | ID4 ID4 inhibitor of DNA binding 4, dominant negative helix-loop-helix protein |
|      |      |        |      | GPLD1 GPLD1 glycosylphosphatidylinositol specific phospholipase D1             |

H

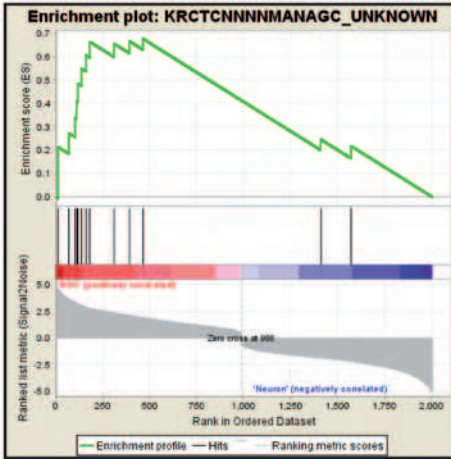

| NSC  |      | Neuron |      | SampleName                                        |
|------|------|--------|------|---------------------------------------------------|
| 1234 | 1234 | 1234   | 1234 |                                                   |
|      |      |        |      | HIST1H2AF HIST1H2AF histone cluster 1, H2af       |
|      |      |        |      | HIST1H2AA HIST1H2AA histone cluster 1, H2aa       |
|      |      |        |      | HIST1H2AB HIST1H2AB histone cluster 1, H2ab       |
|      |      |        |      | HIST1H2AF HIST1H2AF histone cluster 1, H2af       |
|      |      |        |      | HIST1H2BH HIST1H2BH histone cluster 1, H2bh       |
|      |      |        |      | HIST1H2BA HIST1H2BA histone cluster 1, H2ba       |
|      |      |        |      | HIST1H2CA HIST1H2CA histone cluster 3, H2ca       |
|      |      |        |      | HIST1H1A HIST1H1A histone cluster 1, H1a          |
|      |      |        |      | HIST1H2BM HIST1H2BM histone cluster 1, H2bm       |
|      |      |        |      | HIST1H1B HIST1H1B histone cluster 1, H1b          |
|      |      |        |      | HIST1H2BR HIST1H2BR histone cluster 1, H2br       |
|      |      |        |      | UREC1 UREC1 ubiquitin-conjugating enzyme E2C      |
|      |      |        |      | HIST1H2AC HIST1H2AC histone cluster 1, H2ac       |
|      |      |        |      | PHACTR3 PHACTR3 phosphatase and actin regulator 3 |

Figure S1G-H

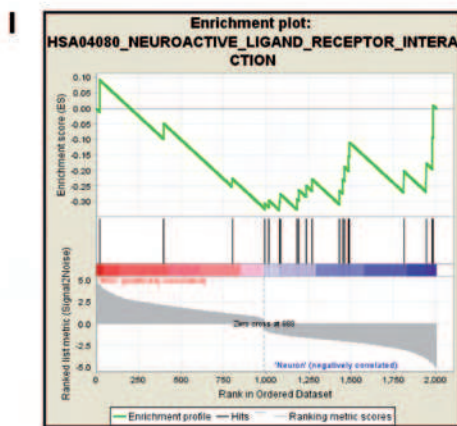

| NSC  | Neuron | SampleName |         |                                                      |
|------|--------|------------|---------|------------------------------------------------------|
| 1234 | 1234   | CHEM3      | CHEM3   | cholinergic receptor, muscarinic 3                   |
|      |        | P2RX7      | P2RX7   | purinergic receptor P2X, ligand-gated ion channel, 7 |
|      |        | ADBR2      | ADBR2   | adrenergic, beta-2-, receptor, surface               |
|      |        | GR12       | GR12    | glutamate receptor, ionotropic, delta 2              |
|      |        | SSTR5      | SSTR5   | somatostatin receptor 5                              |
|      |        | GR1A       | GR1A    | glutamate receptor, ionotropic, AMPA 1               |
|      |        | GRB35      | GRB35   | G protein-coupled receptor 35                        |
|      |        | MCHR2      | MCHR2   | melanin-concentrating hormone receptor 2             |
|      |        | GR13       | GR13    | glutamate receptor, ionotropic, kainate 3            |
|      |        | GABRE2     | GABRE2  | gamma-aminobutyric acid (GABA) B receptor, 2         |
|      |        | GHR        | GHR     | growth hormone receptor                              |
|      |        | ADORA2A    | ADORA2A | adenosine A2A receptor                               |
|      |        | GR1A       | GR1A    | glutamate receptor, ionotropic, AMPA 1               |
|      |        | OPRL1      | OPRL1   | opioid receptor-like 1                               |
|      |        | ADORA1     | ADORA1  | adrenergic, alpha-1A-, receptor                      |
|      |        | MCHR       | MCHR    | melanocortin 4 receptor                              |
|      |        | NPY1R      | NPY1R   | neuropeptide Y receptor Y1                           |
|      |        | ADORA2A    | ADORA2A | adenosine A2A receptor                               |
|      |        | P2RY1      | P2RY1   | purinergic receptor P2Y, G-protein coupled, 1        |
|      |        | GR12A      | GR12A   | glutamate receptor, ionotropic, kainate 2            |

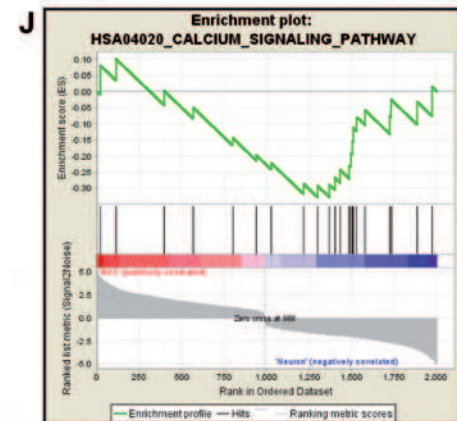

| NSC  | Neuron | SampleName |         |                                                                                                         |
|------|--------|------------|---------|---------------------------------------------------------------------------------------------------------|
| 1234 | 1234   | CHEM3      | CHEM3   | cholinergic receptor, muscarinic 3                                                                      |
|      |        | CAMK2R     | CAMK2R  | calcium/calmodulin-dependent protein kinase (CaM kinase) II beta                                        |
|      |        | P2RX7      | P2RX7   | purinergic receptor P2X, ligand-gated ion channel, 7                                                    |
|      |        | CAIM2      | CAIM2   | calmodulin 2 (phosphorylase kinase, delta)                                                              |
|      |        | ADBR2      | ADBR2   | adrenergic, beta-2-, receptor, surface                                                                  |
|      |        | MYLK       | MYLK    | myosin, light chain kinase                                                                              |
|      |        | SLC12A1    | SLC12A1 | solute carrier family 12, sodium/calcium exchanger, member 1                                            |
|      |        | EPOR4      | EPOR4   | erythropoietin receptor 4 (avian)                                                                       |
|      |        | PLCB1      | PLCB1   | phospholipase C, beta 1 (phosphoinositide-specific)                                                     |
|      |        | CACNA1A    | CACNA1A | calcium channel, voltage-dependent, L type, alpha 1A subunit                                            |
|      |        | CACNA1B    | CACNA1B | calcium channel, voltage-dependent, L type, alpha 1B subunit                                            |
|      |        | ADORA2A    | ADORA2A | adenosine A2A receptor                                                                                  |
|      |        | ADORA1     | ADORA1  | adrenergic, alpha-1A-, receptor                                                                         |
|      |        | PRKAI      | PRKAI   | phosphorylase kinase, alpha 1 (muscle)                                                                  |
|      |        | GNAT       | GNAT    | guanine nucleotide binding protein (G protein), alpha activating activity polypeptide, olfactory type 2 |
|      |        | EYF2       | EYF2    | ryanodine receptor 2 (cardiac)                                                                          |
|      |        | PTK2R      | PTK2R   | protein tyrosine kinase 2 beta                                                                          |
|      |        | PRKG1      | PRKG1   | phosphorylase kinase, gamma 1 (muscle)                                                                  |
|      |        | ATP2B3     | ATP2B3  | ATPase, class transporting, plasma membrane 3                                                           |
|      |        | PDGFRA     | PDGFRA  | platelet-derived growth factor receptor, alpha polypeptide                                              |
|      |        | CAMK2D     | CAMK2D  | calcium/calmodulin-dependent protein kinase (CaM kinase) II delta                                       |
|      |        | PLCB1      | PLCB1   | phospholipase C, delta 1                                                                                |

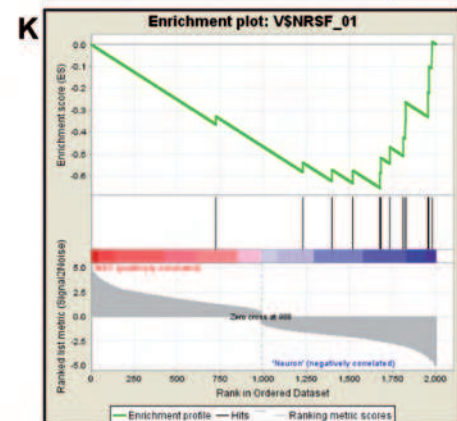

| NSC  | Neuron | SampleName |        |                                                                            |
|------|--------|------------|--------|----------------------------------------------------------------------------|
| 1234 | 1234   | HEF1       | HEF1   | heiry and enhancer of split 1 (Drosophila)                                 |
|      |        | DMG        | DMG    | oligodendrocyte myelin glycoprotein                                        |
|      |        | INA        | INA    | interneurin neuronal intermediate filament protein, alpha                  |
|      |        | TRIMS      | TRIMS  | tripartite motif-containing 6                                              |
|      |        | DBC1       | DBC1   | deleted in bladder cancer 1                                                |
|      |        | P2RX7      | P2RX7  | purinergic receptor P2X, ligand-gated ion channel, 7                       |
|      |        | RPH3A      | RPH3A  | rahphilin 3A homolog (mouse)                                               |
|      |        | SVTA       | SVTA   | synaptotagmin IV                                                           |
|      |        | SHAP2      | SHAP2  | synaptonemal-associated protein, 29kDa                                     |
|      |        | OGDH       | OGDH   | oxoglutarate dehydrogenase-like                                            |
|      |        | FLAV13     | FLAV13 | FLAV (lethronic lethal, abnormal vision, Drosophila)-like 3 (Hu antigen C) |
|      |        | GDAP11     | GDAP11 | ganglioside-induced differentiation-associated protein 1-like 1            |
|      |        | CHG1       | CHG1   | chromogranin 3 (parathyroid secretory protein 1)                           |

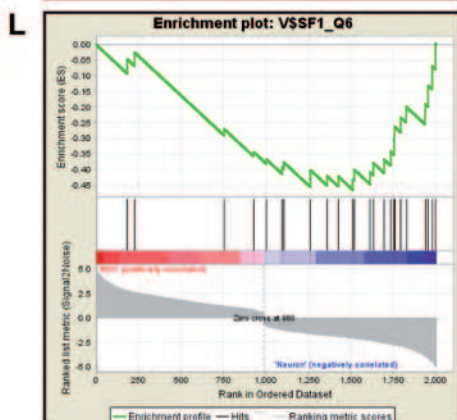

| NSC  | Neuron | SampleName |          |                                                                            |
|------|--------|------------|----------|----------------------------------------------------------------------------|
| 1234 | 1234   | SPR4       | SPR4     | sporadic protein 4                                                         |
|      |        | RIB1R      | RIB1R    | RIB1 budding uninhibited by hexamides 1 homolog beta (yeast)               |
|      |        | CHRF1      | CHRF1    | chrysalin 1                                                                |
|      |        | KCNK1      | KCNK1    | potassium voltage-gated channel, Shaw-related subfamily, member 1          |
|      |        | SLITERR1   | SLITERR1 | SLIT and NTRG-like family, member 1                                        |
|      |        | PANK1      | PANK1    | panthothenate kinase 1                                                     |
|      |        | CATSPER2   | CATSPER2 | cation channel, sperm associated 2                                         |
|      |        | NEFL       | NEFL     | nebulin                                                                    |
|      |        | FRYDC      | FRYDC    | F-fox protein 2                                                            |
|      |        | MAL        | MAL      | mal, T-cell differentiation protein                                        |
|      |        | SCN1A      | SCN1A    | sodium-related receptor, LDR class, 1 repeat-containing                    |
|      |        | SLC24A4    | SLC24A4  | solute carrier family 24, facilitated glucose transporter, member 4        |
|      |        | PNMT       | PNMT     | potassium channel, subfamily F, member 1                                   |
|      |        | SPN47A     | SPN47A   | scaphorin 7A, GPI membrane anchor (John Milton Hagen blood group)          |
|      |        | TUBB4      | TUBB4    | tubulin, beta 4                                                            |
|      |        | ABAT       | ABAT     | 4-aminobutyrate aminotransferase                                           |
|      |        | RPH3A      | RPH3A    | rahphilin 3A homolog (mouse)                                               |
|      |        | HR23C      | HR23C    | HR23 family member 3                                                       |
|      |        | SLC7A8     | SLC7A8   | solute carrier family 7 (glycerol-3-phosphate transporter), member 8       |
|      |        | ABHD3      | ABHD3    | abhydrolase domain containing 3                                            |
|      |        | OGDH       | OGDH     | oxoglutarate dehydrogenase-like                                            |
|      |        | ATP1A4     | ATP1A4   | ATPase, Na/K+ transporting, alpha 4 polypeptide                            |
|      |        | FLAV13     | FLAV13   | FLAV (lethronic lethal, abnormal vision, Drosophila)-like 3 (Hu antigen C) |
|      |        | CHGA       | CHGA     | chromogranin 3 (parathyroid secretory protein 1)                           |
|      |        | FDX5       | FDX5     | fibronectin type III domain containing 5                                   |

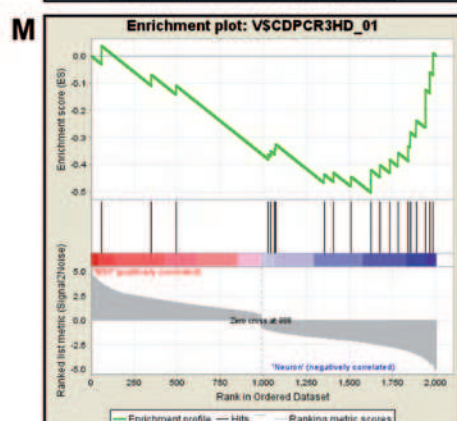

| NSC  | Neuron | SampleName |          |                                                                                                       |
|------|--------|------------|----------|-------------------------------------------------------------------------------------------------------|
| 1234 | 1234   | TIMELESS   | TIMELESS | timeless homolog (Drosophila)                                                                         |
|      |        | IFED2      | IFED2    | interferon-related developmental regulator 2                                                          |
|      |        | SLC12A2    | SLC12A2  | solute carrier family 12, member 2                                                                    |
|      |        | ITGA7      | ITGA7    | integrin, alpha 7                                                                                     |
|      |        | NR3C2      | NR3C2    | nuclear receptor subfamily 3, group C, member 2                                                       |
|      |        | STPAP2     | STPAP2   | six transmembrane epithelial antigen of the prostate 2                                                |
|      |        | BRN114     | BRN114   | brn-like 4, RNA binding protein (Drosophila)                                                          |
|      |        | EFH15      | EFH15    | EFH finger protein 15                                                                                 |
|      |        | FEEM14     | FEEM14   | FE domain containing 14                                                                               |
|      |        | DIO2       | DIO2     | deiodinase, iodothyronine, type II                                                                    |
|      |        | DEP1D      | DEP1D    | dipeptidyl-peptidase 1D                                                                               |
|      |        | DEP2       | DEP2     | dipeptidyl-peptidase 2                                                                                |
|      |        | DBC1       | DBC1     | deleted in bladder cancer 1                                                                           |
|      |        | RPH3A      | RPH3A    | rahphilin 3A homolog (mouse)                                                                          |
|      |        | MYT1       | MYT1     | myelin transcription factor 1                                                                         |
|      |        | ELF1A      | ELF1A    | ElF1-like factor 15                                                                                   |
|      |        | CMD3       | CMD3     | CBR and Sushi multiple domains 3                                                                      |
|      |        | CAMK2D     | CAMK2D   | calcium/calmodulin-dependent protein kinase (CaM kinase) II delta                                     |
|      |        | ACCN2      | ACCN2    | aniloride-sensitive cation channel 2, neuronal                                                        |
|      |        | IL1RAP1    | IL1RAP1  | interleukin 1 receptor accessory protein-like 1                                                       |
|      |        | KCNK1      | KCNK1    | potassium voltage-gated channel, Shaker-related subfamily, member 1 (epileptic ataxia with myoclonia) |
|      |        | GR12A      | GR12A    | glutamate receptor, ionotropic, kainate 2                                                             |

Figure S11-M



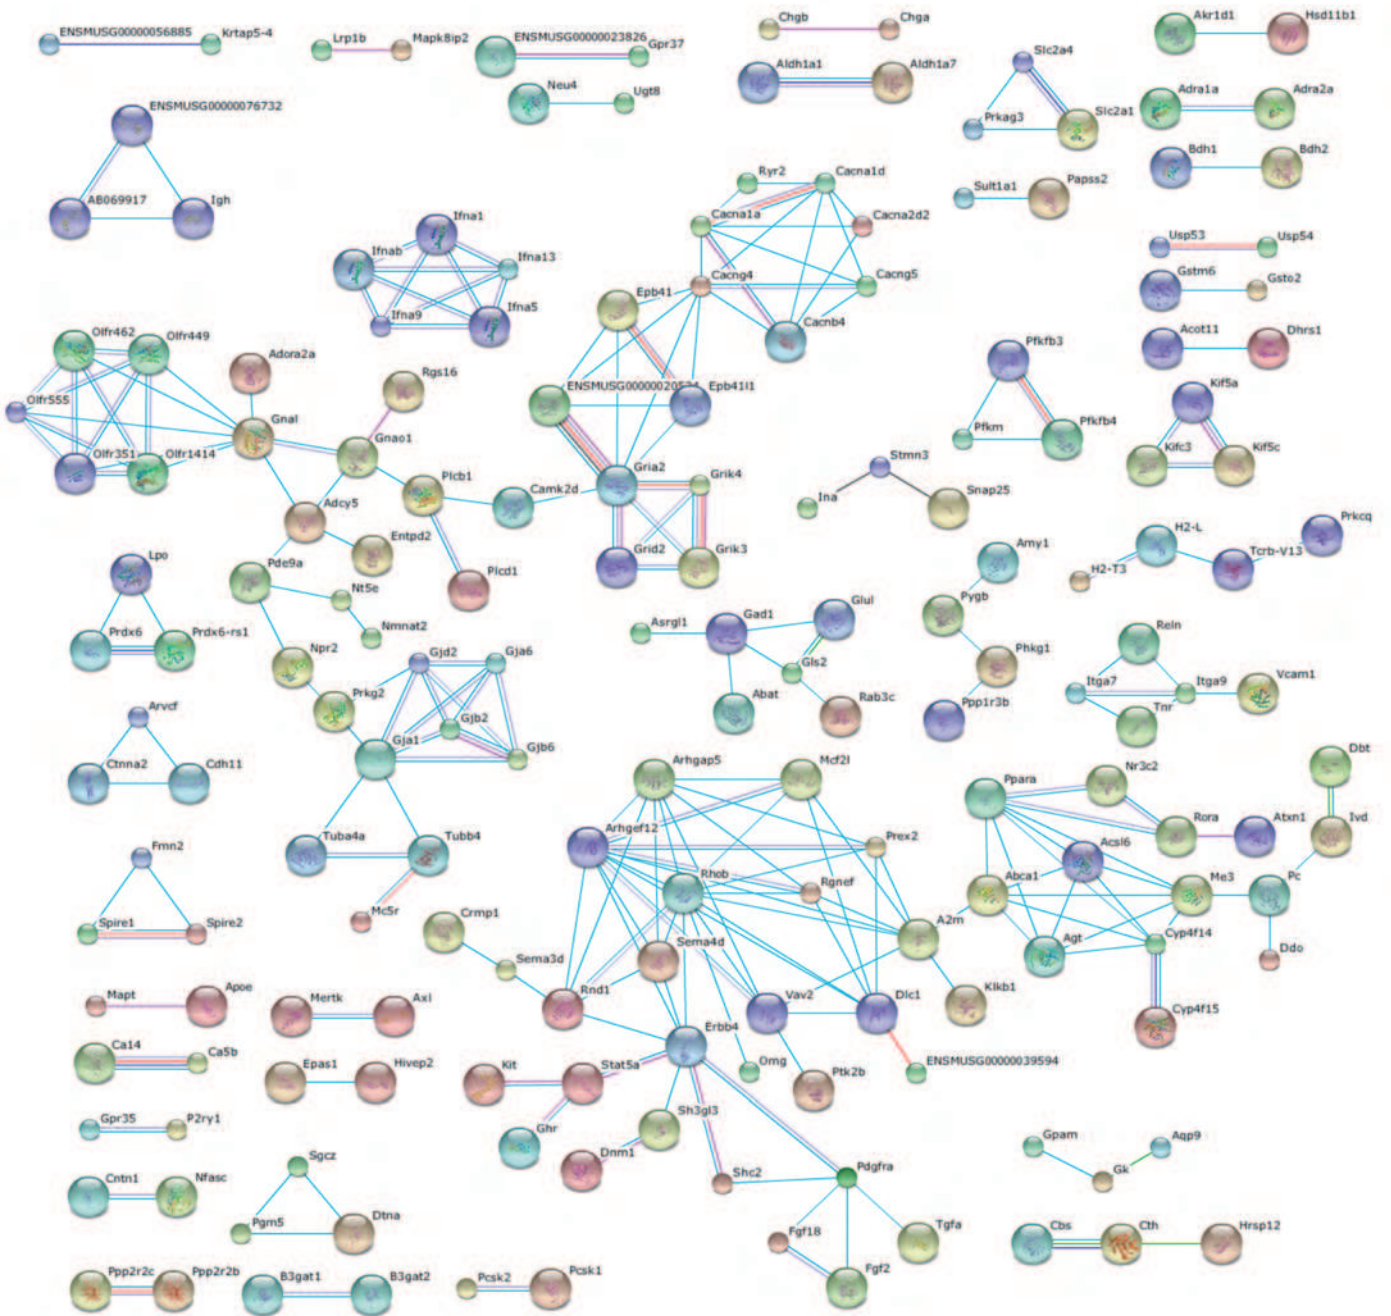

Figure S1S

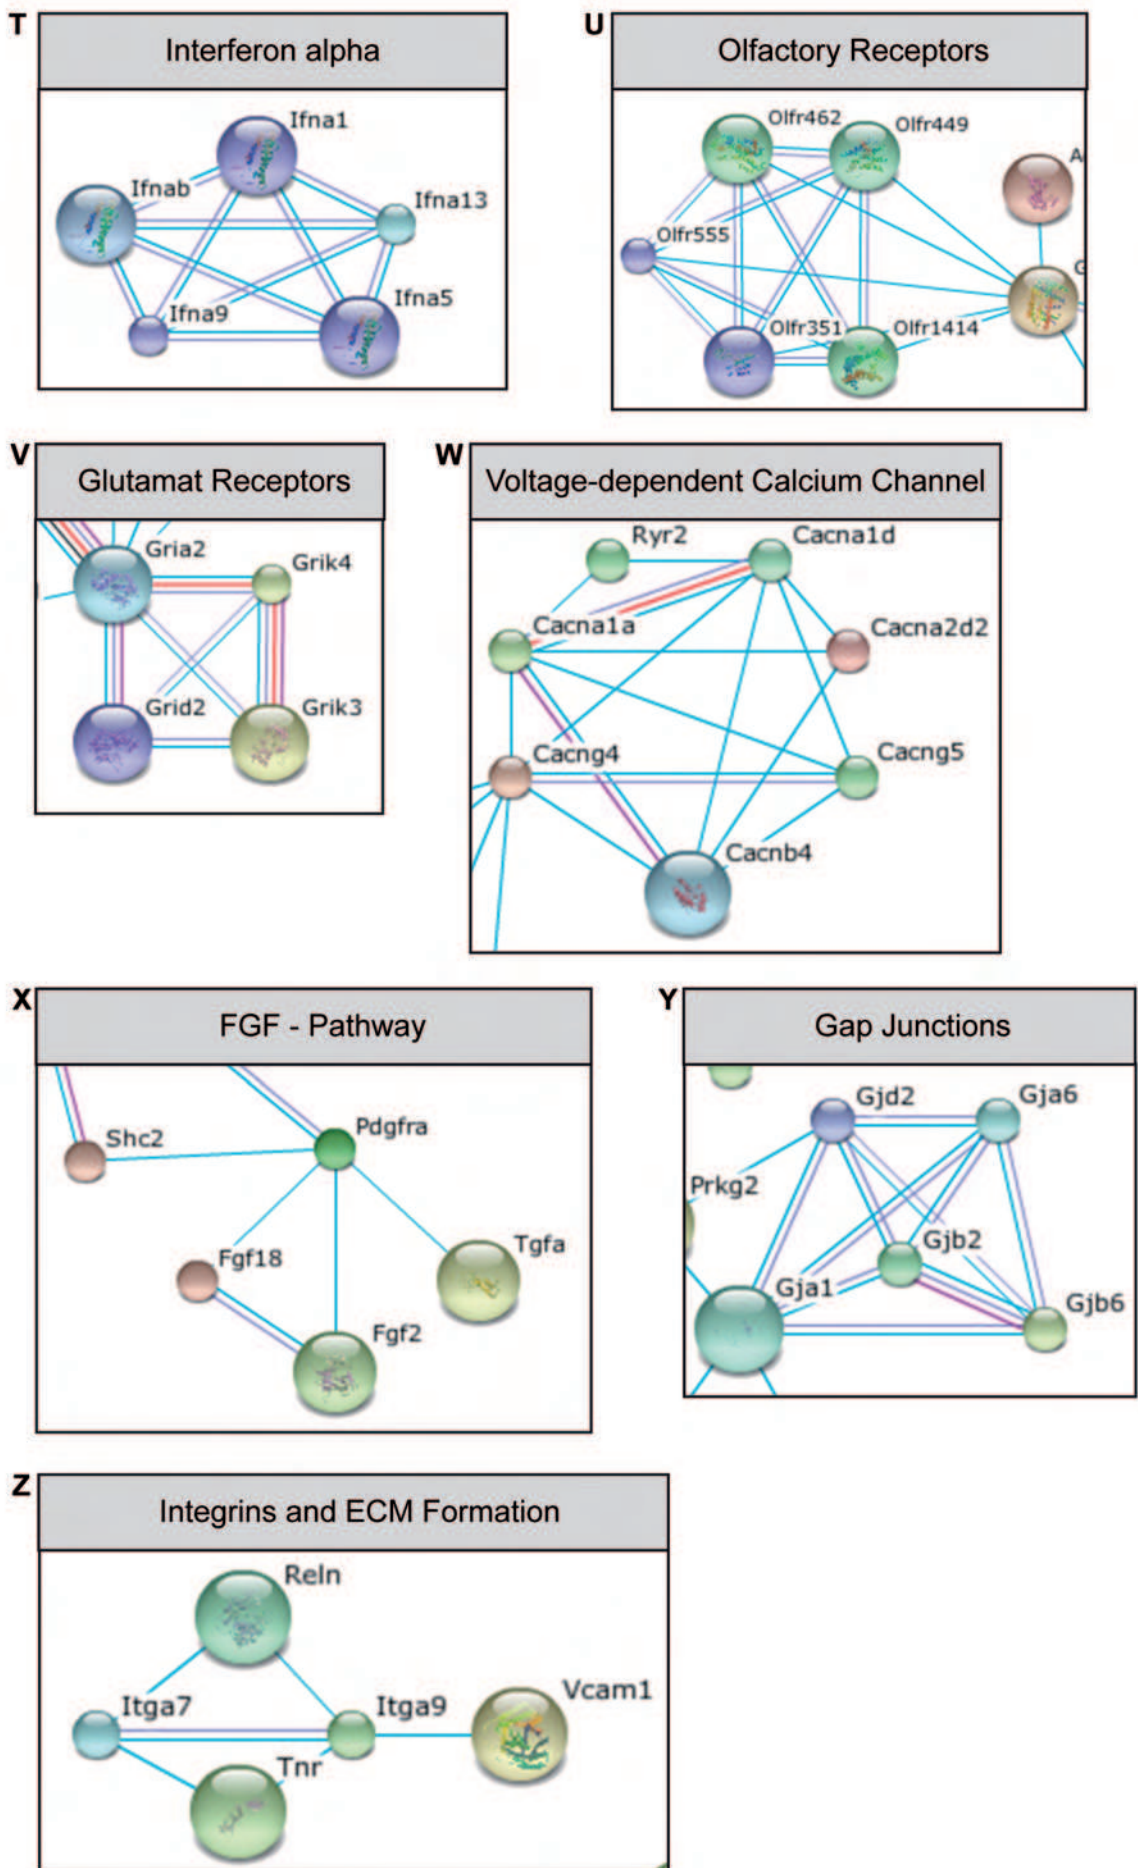

Figure S1T-Z

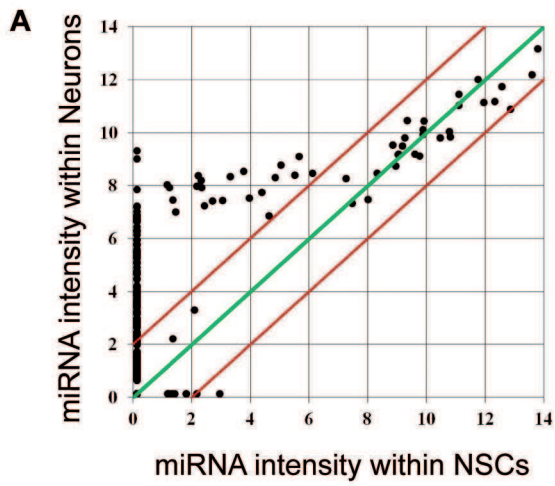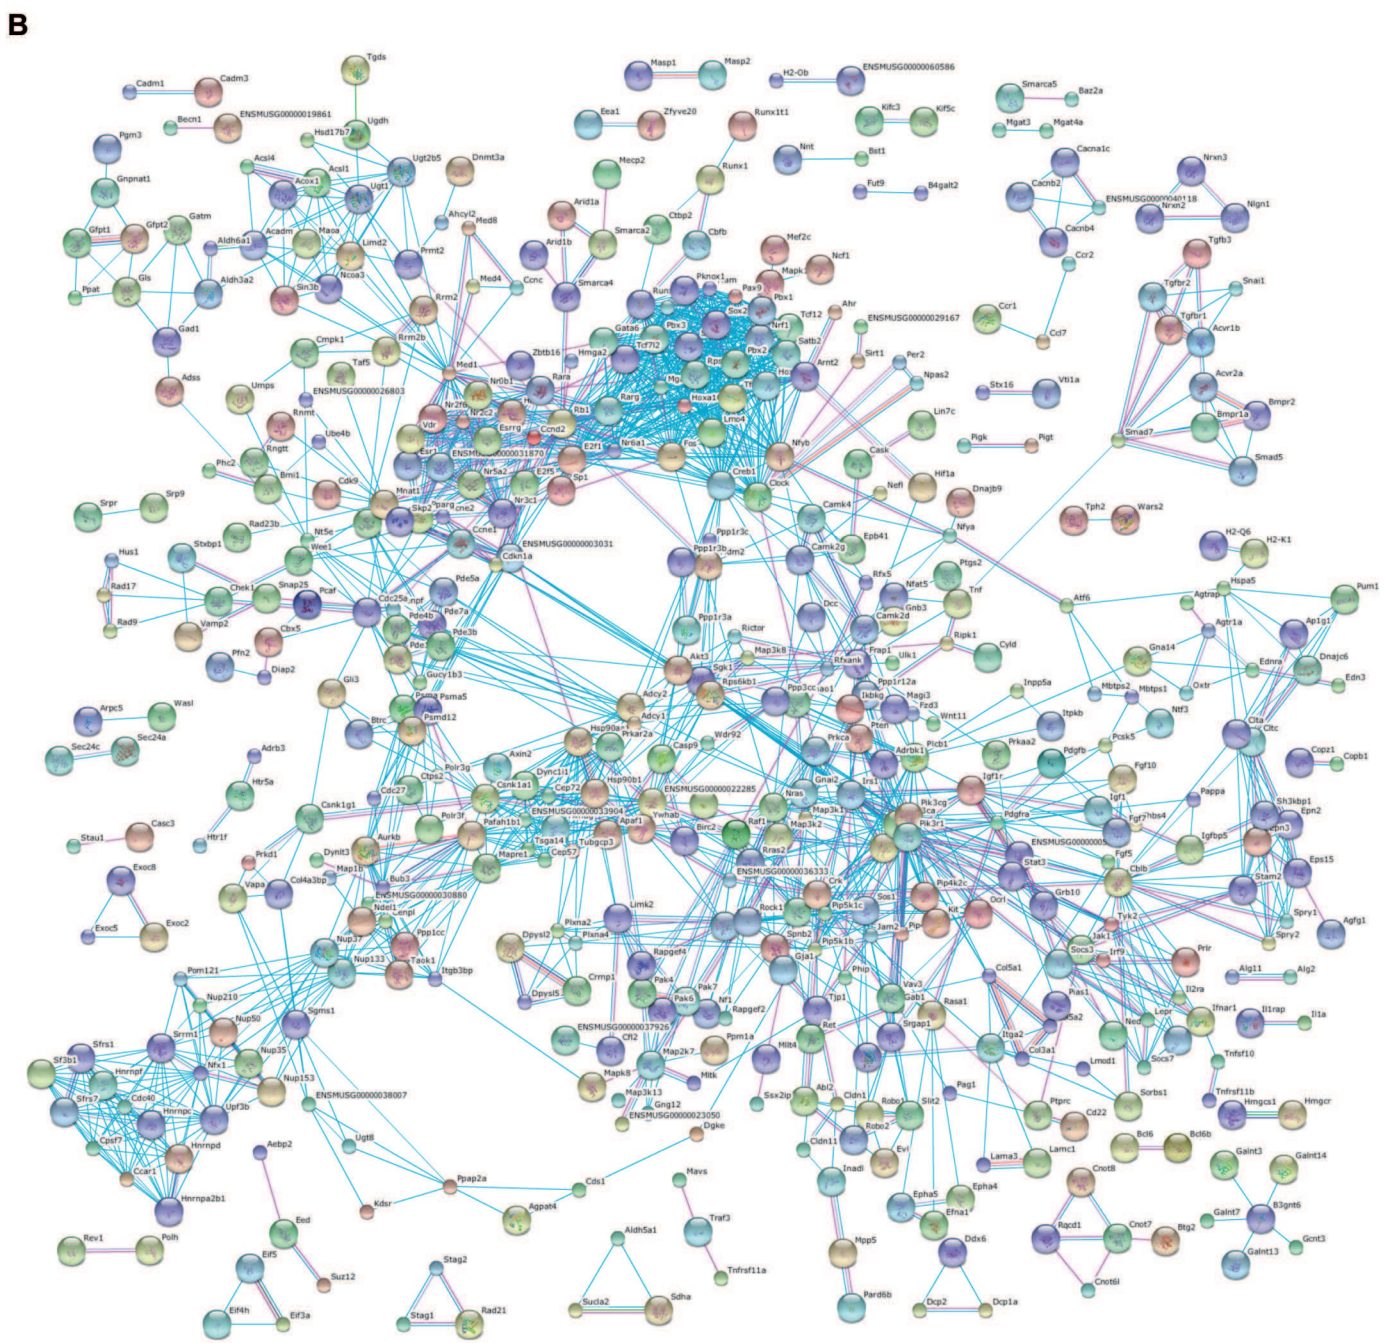

Figure S2A-B



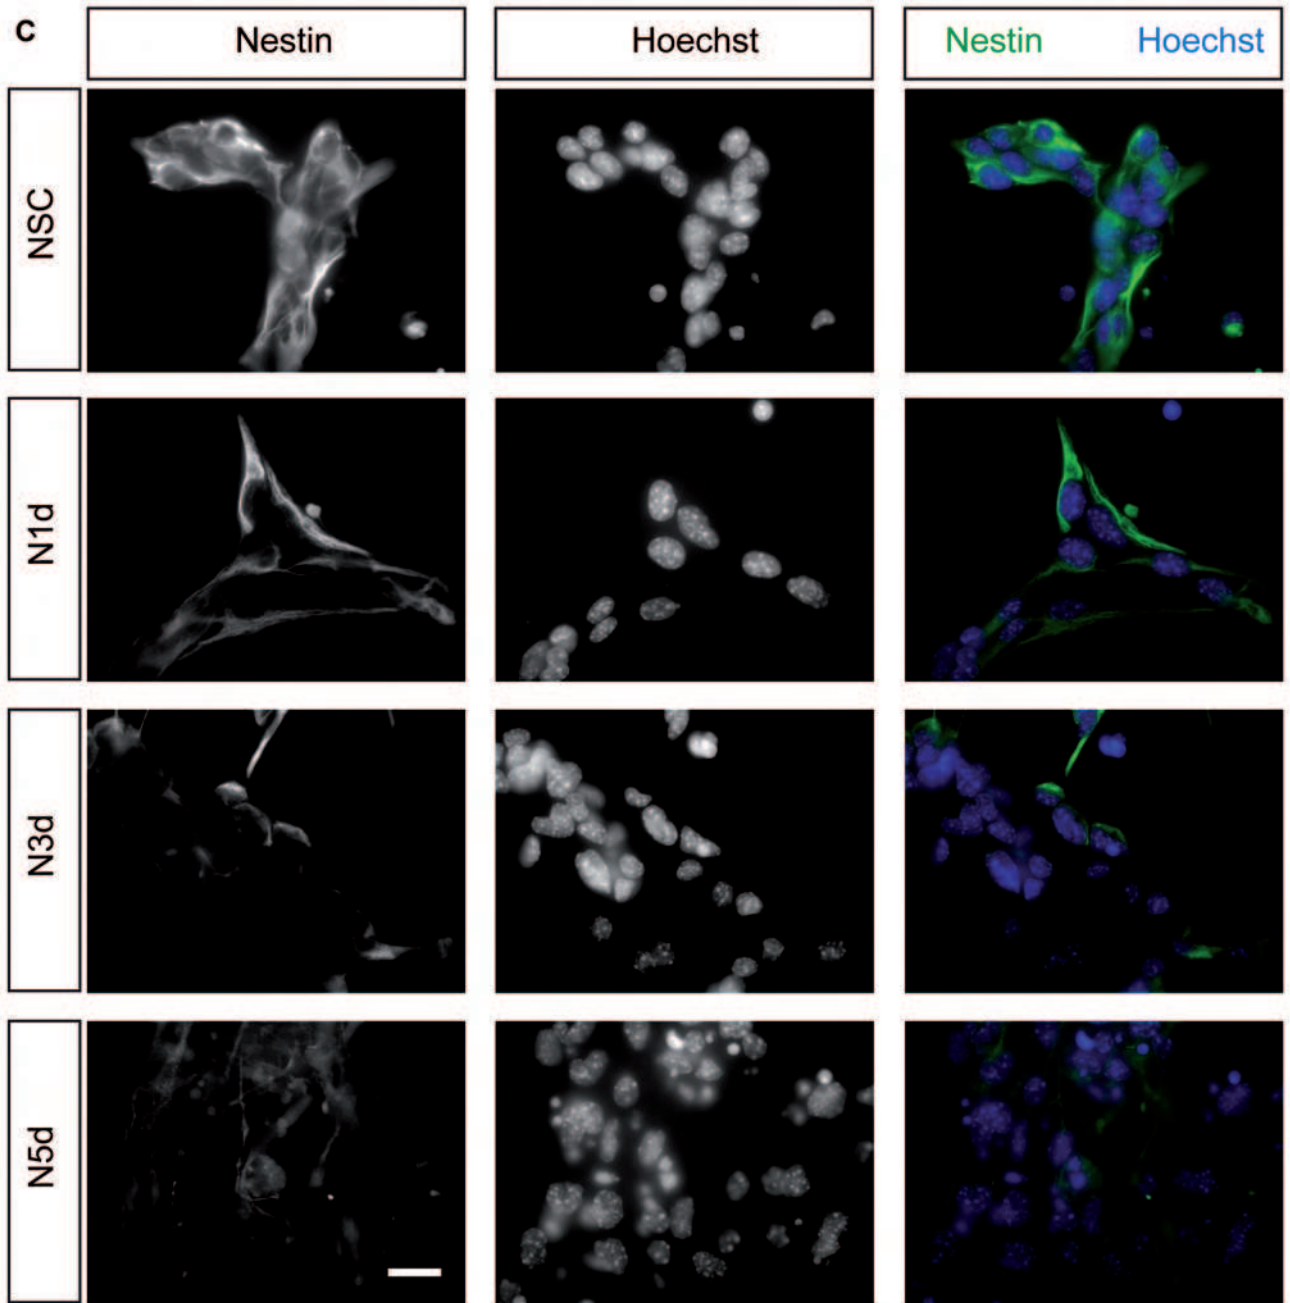

Figure S2C

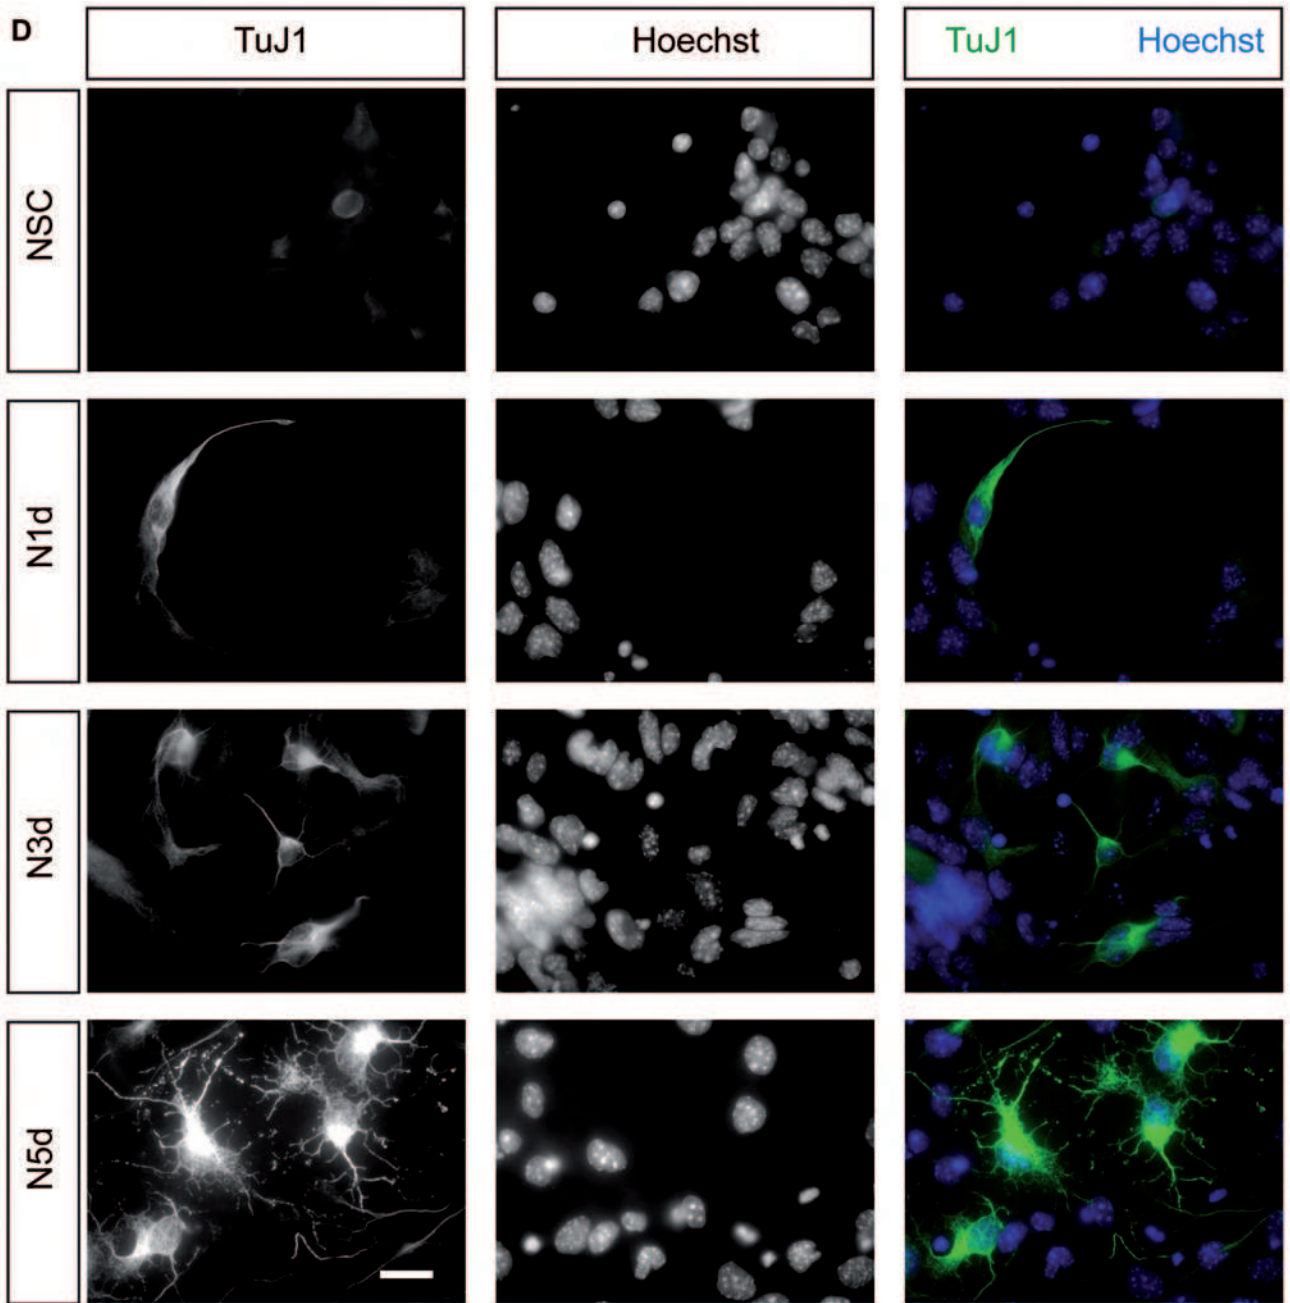

Figure S2D

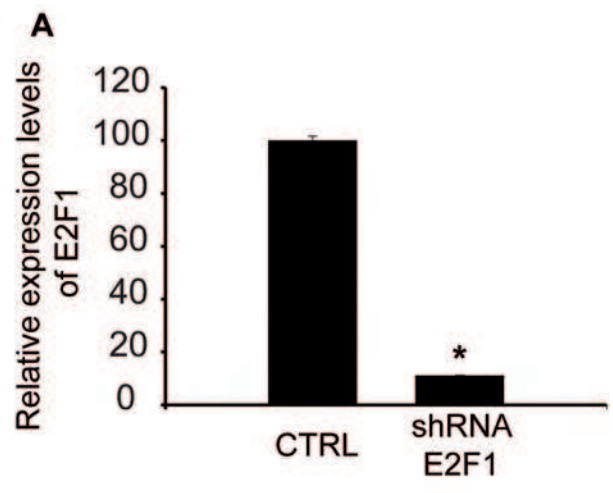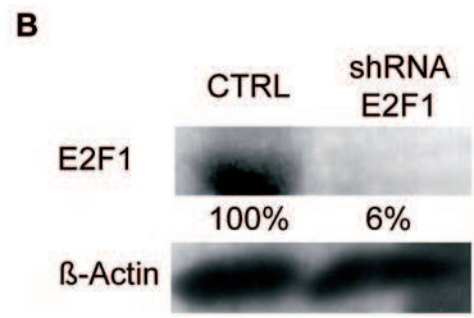

Figure S3

### Cluster miR-17~92

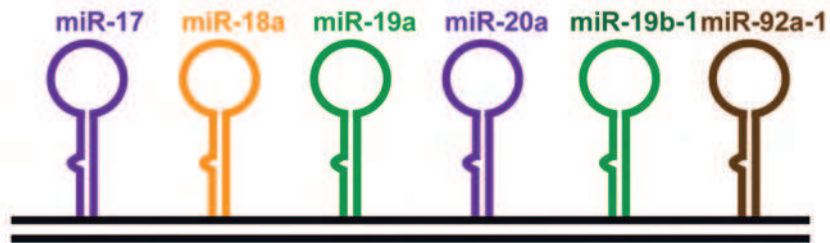

miR-17 family  
miR-18 family  
miR-19 family  
miR-92 family

### Cluster miR-106a~363

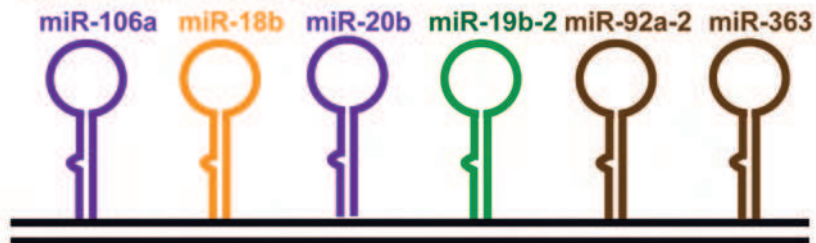

### Sequences of E2F1 associated miRNAs

|              |                         |
|--------------|-------------------------|
| Mmu-miR-17   | CAAAGUGCUUACAGUGCAGGUAG |
| Mmu-miR-20a  | UAAAGUGCUUAUAGUGCAGGUAG |
| Mmu-miR-20b  | CAAAGUGCUCAUAGUGCAGGUAG |
| Mmu-miR-106a | CAAAGUGCUAACAGUGCAGGUAG |
| Mmu-miR-18a  | UAAGGUGCAUCUAGUGCAGAUAG |

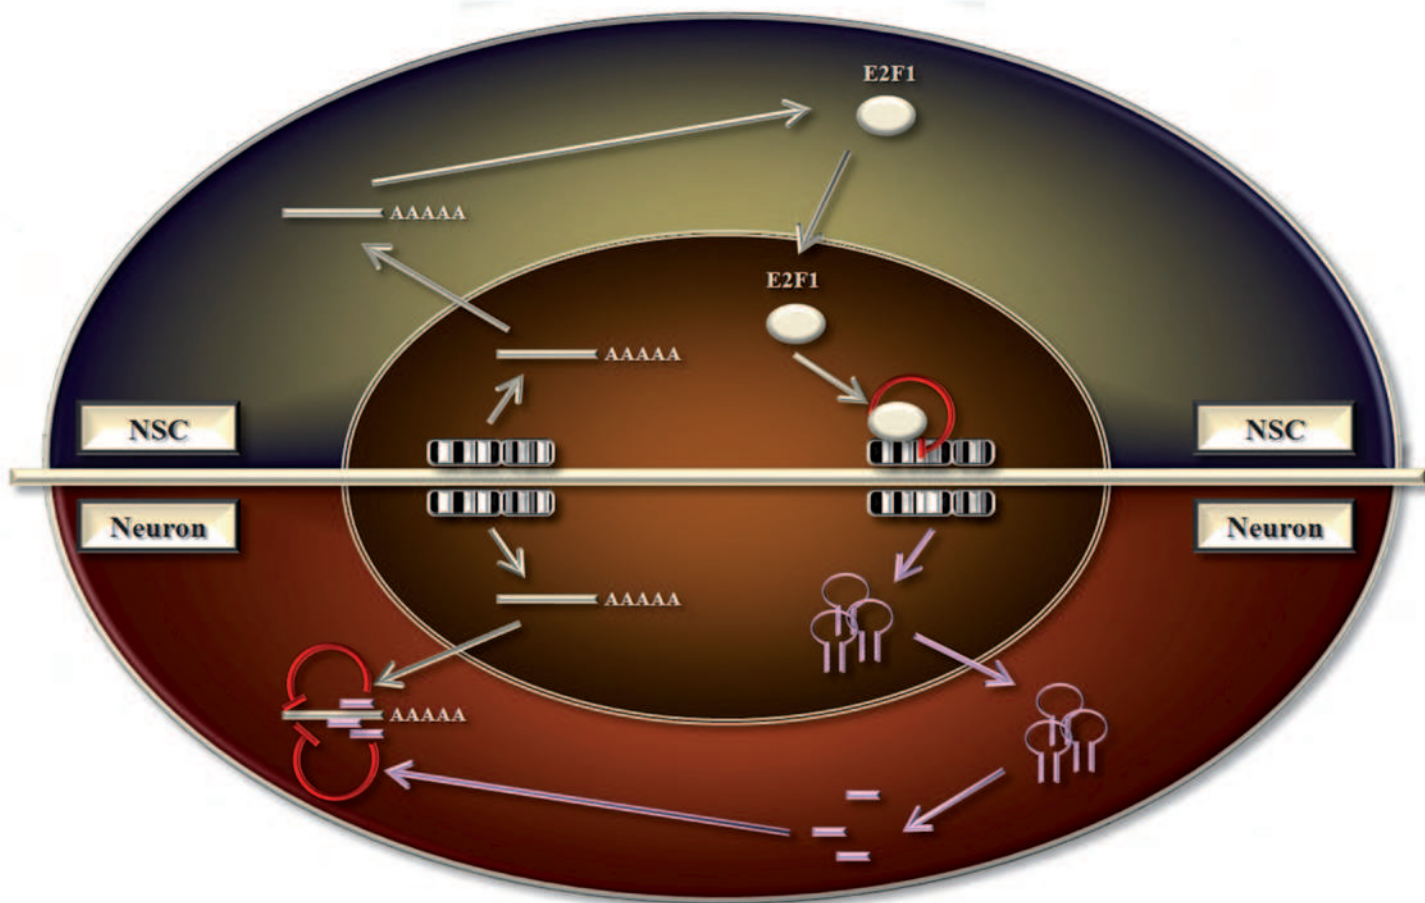

Figure S5

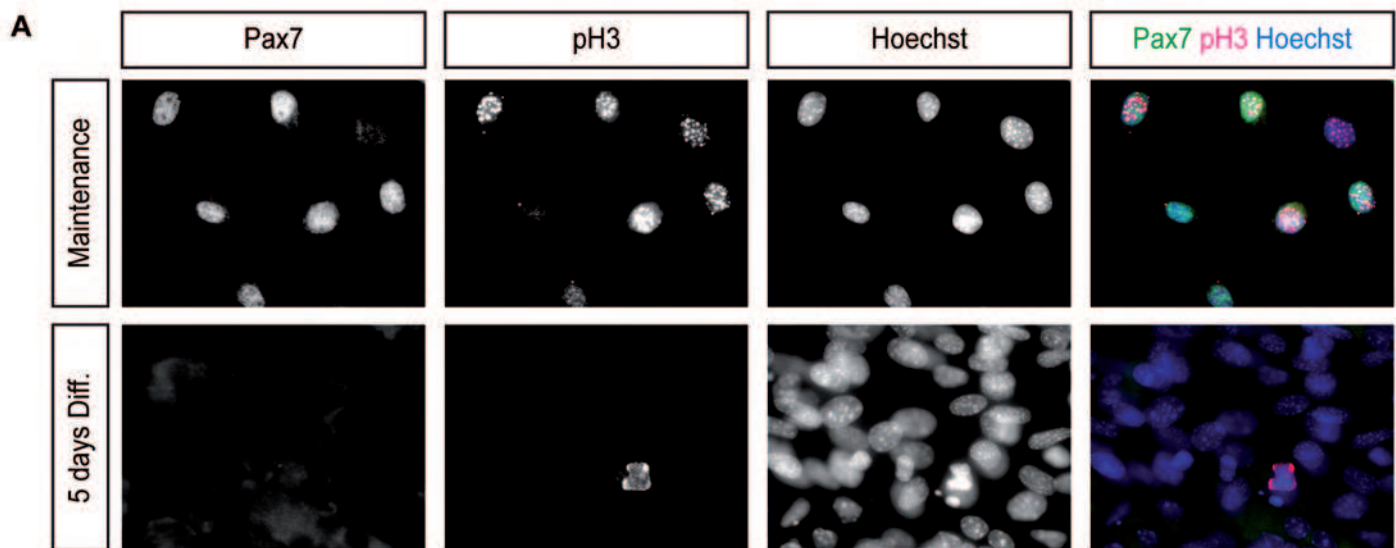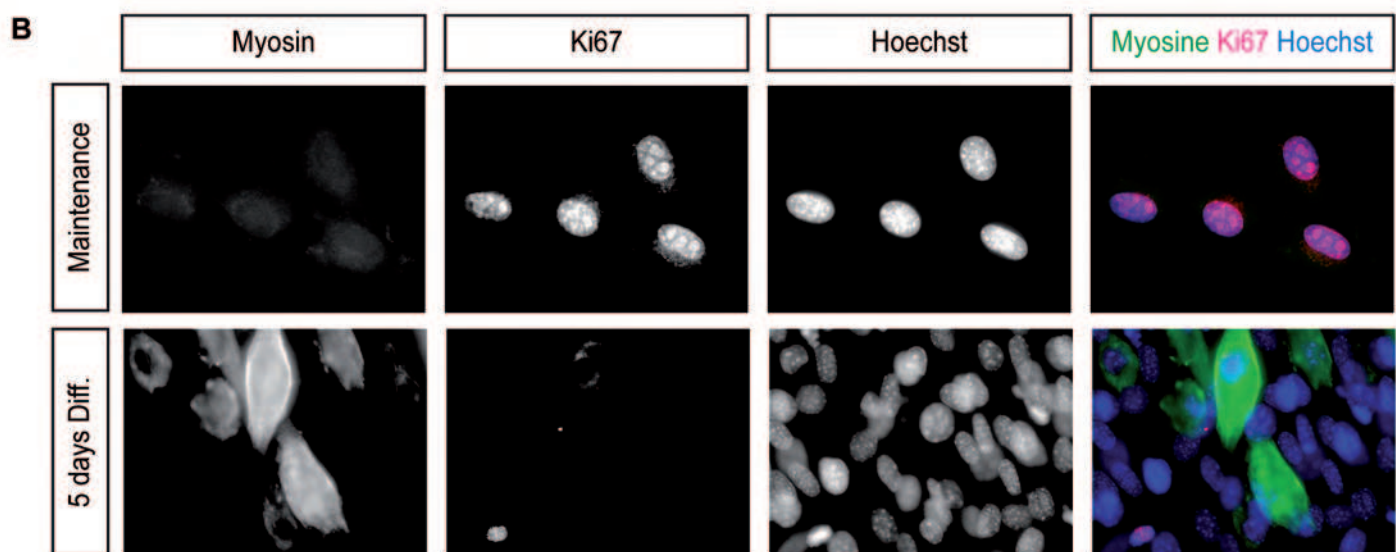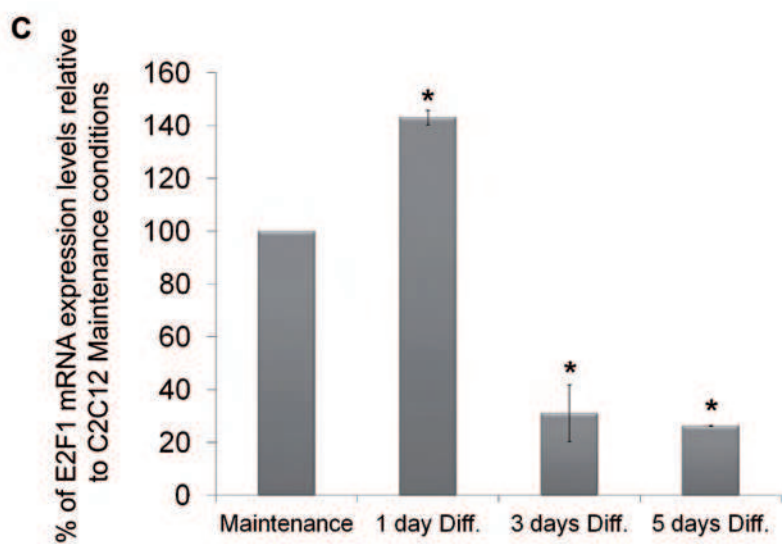

Figure S6
